# 1 The theoretical molecular weight of 2 NaYF<sub>4</sub>:RE upconversion nanoparticles

3 Lewis E. Mackenzie,<sup>[a]</sup> Jack A. Goode,<sup>[a]</sup> Alexandre Vakurov,<sup>[a]</sup> Padmaja P. Nampi,<sup>[b]</sup> Sikha Saha,<sup>[c]</sup> Gin  
4 Jose,<sup>[b]</sup> Paul A. Millner.<sup>[a]</sup>

5 [a] School of Biomedical Sciences, Faculty of Biological Sciences, University of Leeds, United Kingdom, LS2 9JT.

6 [b] School of Chemical and Process Engineering, Faculty of Engineering, University of Leeds, United Kingdom, LS2 9JT.

7 [c] Leeds Institute of Cardiovascular and Metabolic Medicine (LICAMM), Faculty of Medicine and Health, University of  
8 Leeds, United Kingdom, LS2 9JT.

9 **Corresponding author:** Lewis MacKenzie [L.MacKenzie1@Leeds.ac.uk](mailto:L.MacKenzie1@Leeds.ac.uk)

## 10 Abstract

11 Upconversion nanoparticles (UCNPs) are utilized extensively for biomedical imaging, sensing, and  
12 therapeutic applications, yet the molecular weight of UCNPs has not previously been reported. We  
13 present a theory based upon the crystal structure of UCNPs to estimate the molecular weight of  
14 UCNPs: enabling insight into UCNP molecular weight for the first time. We estimate the theoretical  
15 molecular weight of various UCNPs reported in the literature, predicting that spherical NaYF<sub>4</sub>  
16 UCNPs ~ 10 nm in diameter will be ~1 MDa (i.e. 10<sup>6</sup> g/mol), whereas UCNPs ~ 45 nm in diameter  
17 will be ~100 MDa (i.e. 10<sup>8</sup> g/mol). We also predict that hexagonal crystal phase UCNPs will be of  
18 greater molecular weight than cubic crystal phase UCNPs. Additionally we find that a Gaussian  
19 UCNP diameter distribution will correspond to a lognormal UCNP molecular weight distribution.  
20 Our approach could potentially be generalised to predict the molecular weight of other arbitrary  
21 crystalline nanoparticles: as such, we provide standalone graphic user interfaces to calculate the  
22 molecular weight both UCNPs and arbitrary crystalline nanoparticles. We expect knowledge of  
23 UCNP molecular weight to be of wide utility in biomedical applications where reporting UCNP  
24 quantity in absolute numbers or molarity will be beneficial for inter-study comparison and  
25 repeatability.

## 26 Introduction

27 Photonic upconversion nanoparticles (UCNPs) have garnered widespread scientific interest due  
28 to their unique near infra-red (NIR) excitation and visible luminescence properties; a process  
29 known as photonic upconversion. UCNPs are inorganic crystalline nanostructures (typically NaYF<sub>4</sub>)  
30 co-doped with rare-earth (RE) ions, (e.g. Yb<sup>3+</sup>, Er<sup>3+</sup>, Gd<sup>3+</sup>); hereby referred to in general terms as  
31 NaYF<sub>4</sub>:RE UCNPs. The RE ions act as sensitizers and emitters for photonic upconversion of multiple  
32 infra-red photons, resulting in visible luminescence emission. UCNP emission is highly stable,<sup>1</sup> with  
33 no photo bleaching, and a relatively long luminescence emission lifetime ranging from hundreds of  
34 microseconds to a few milliseconds.<sup>2,3</sup> NIR excitation via upconversion is highly advantageous for  
35 biomedical applications, where ultraviolet or visible excitation of fluorophores (e.g. dyes, proteins,  
36 or quantum dots) is normally required, with the associated challenges of photo-bleaching and  
37 photo-toxicity. Interactions between nearby molecules and the UCNPs crystal structure enables  
38 molecular biosensing via luminescence resonance energy transfer (LRET) between UCNPs and  
39 molecules in proximity to them.<sup>4-10</sup> As such, UCNPs have found wide utility in biomedical  
40 applications, including as imaging contrast labels *in cellulo*, *in vivo*, and *ex vivo*<sup>5,11-19</sup>; as biosensors  
41 for detection of antibiotics<sup>20</sup> and toxins in food<sup>21-23</sup>; as biosensors to measure biomarkers in  
42 biological fluids (e.g. whole blood, serum, urine),<sup>6-8,24-26</sup> and as therapeutic agents, against targets  
43 such as cancer cells.<sup>27,28</sup> Additionally UCNPs have been applied to nanoscale thermometry<sup>29,30</sup> and  
44 photovoltaic applications.<sup>31,32</sup> However, to date, the molecular weight of UCNPs has not been  
45 reported: as such, both the molarity of UCNPs in solution, and the absolute number of UCNPs in a  
46 sample has been unknown.

47 The lack of molecular weight information for UCNPs is a considerable shortcoming in biomedical  
48 applications of UCNPs, where precise quantification of UCNP concentration would be highly  
49 beneficial for informing of dosage of UCNPs studies, as well as aiding inter-study comparison.  
50 Additionally, quantification of UCNP molarity and absolute number of UCNPs would be highly  
51 beneficial when constructing biosensors where the ratio of UCNPs compared to other molecules,  
52 e.g. antibodies<sup>6-8,25</sup> or oligonucleotides,<sup>33</sup> is important for informing biosensor design.

53 The lack of information on UCNP molecular weight is likely due to lack of experimental  
54 techniques capable of measuring the molecular weight of large macromolecules such as UCNPs.  
55 Using the theory we present in this paper, we predict that the molecular weight of NaYF<sub>4</sub>:RE UCNPs  
56 will range from a few mega Daltons (MDa) (i.e. 10<sup>6</sup> g/mol) for exceptionally small UCNPs (~10 nm in  
57 diameter), to > 100 MDa (for UCNPs with a more typical diameter of ~45 nm). This large molecular  
58 weight range is well beyond the measurement limits both mass spectrometry and sedimentation

59 velocity analytical ultracentrifugation (svUAC), which are limited to < 40 kDa and < 5 MDa  
60 respectively.<sup>34</sup> Despite this limitation, we attempted to employ svAUC to estimate the molecular  
61 weight of UCNPs ~30 nm in diameter (corresponding to a molecular weight of ~40 MDa), but  
62 reliable results were not obtained (see the Discussion section and supplementary material).

63 In this study, we present a theoretical method, based upon the extensively studied and  
64 empirically proven theory of crystallography and UCNP structure, to calculate the molecular weight  
65 UCNPs, accounting for UCNP composition and morphology. In brief, the crystalline structure of  
66 UCNPs is quantified by transmission electron microscopy (TEM), and x-ray diffraction (XRD)  
67 experiments. From this information, the total atomic weight within a single NaYF<sub>4</sub>:RE unit cell, and  
68 the total number of unit cells within a UCNP can be calculated. Thus, the theoretical molecular  
69 weight of UCNPs can be calculated by summing up the total molecular weight contained within all  
70 unit cells in a UCNP.

71 We anticipate that this theoretical framework could be extended to crystalline nanoparticles of  
72 arbitrary morphology and composition, provided that the crystalline structure of such  
73 nanoparticles are known. As such, we also provide two stand-alone graphical user interfaces (GUIs)  
74 for simple calculation of the molecular weight of both NaYF<sub>4</sub>:RE UCNPs and arbitrary crystalline  
75 nanoparticles. Knowledge of UCNP molecular weight will likely be highly beneficial for  
76 quantification of UCNP concentration in biomedical applications.

## 77 **Theory**

### 78 **Crystalline structure and photonic upconversion properties of UCNPs**

79 The key to understanding both the optical properties of UCNPs and their molecular weight lies  
80 in the crystalline structure of UCNPs. UCNPs are a crystal lattice made up of repeating crystal unit  
81 cells of NaYF<sub>4</sub>, with a fraction of Y<sup>3+</sup> ions selectively replaced by RE dopants (see Figure 1). In  
82 UCNPs, photonic upconversion is enabled by the absorption of two or more near-infrared photons,  
83 which, via excitation of several long-lived metastable electron states, and subsequent non-radiative  
84 multi-phonon and radiative relaxation, produces luminescence emission at visible wavelengths (see  
85 Figure 2). Efficient upconversion requires a crystalline host lattice, which is doped with multiple  
86 different lanthanide ions (typically Yb<sup>3+</sup> and Er<sup>3+</sup>), where one lanthanide ion acts as a photo-  
87 sensitizer (typically Yb<sup>3+</sup>) and acts as a photonic emitter (typically Er<sup>3+</sup>).<sup>35</sup> Although many different  
88 combinations of lattice and RE dopants have been explored,<sup>36</sup> the combination of Yb<sup>3+</sup> and Er<sup>3+</sup> ions  
89 in a NaYF<sub>4</sub> host lattice has been found to provide high upconversion efficiency, and as such is  
90 commonly used for UCNPs.<sup>37,38</sup> Figure 2 shows an exemplar upconversion emission spectrum of

91 NaYF<sub>4</sub>:Yb,Er cubic UCNPs (20% Yb<sup>3+</sup>, 2% Er<sup>3+</sup>) and the corresponding Jablonski diagram for  
 92 upconversion.<sup>39</sup>

93

94 NaYF<sub>4</sub>:RE unit cells are either a cubic or a hexagonal crystal lattice arrangement (see Figure 1).  
 95 In the face-centred cubic lattice arrangement (Na<sub>2</sub>Y<sub>2</sub>F<sub>8</sub>), high-symmetry cation sites are formed, and  
 96 are randomly occupied by either Na<sup>+</sup> or RE<sup>3+</sup> ions (see Figure 1a), and Y<sup>3+</sup> ions are substituted for  
 97 other RE<sup>3+</sup> ions, enabling photonic upconversion. In hexagonal unit cells (Na<sub>1.5</sub>Y<sub>1.5</sub>F<sub>6</sub>), there are two  
 98 relatively low-symmetry cation sites, which contain either Na<sup>+</sup> or RE<sup>3+</sup> ions (see Figure 1b).<sup>40</sup>  
 99 Characterisation of UCNP unit cells is typically conducted by XRD measurements. Several studies  
 100 have reported the crystal lattice parameters associated with cubic and hexagonal NaYF<sub>4</sub>:RE UCNPs:  
 101 these are summarised in Table 1. Wang et al., (2010)<sup>40</sup> report unit cell parameters for cubic (α  
 102 phase) and hexagonal (β phase) unit NaYF<sub>4</sub>:RE unit cell configurations (see Figure 1). The  
 103 arrangement of ions within unit cells influences the crystal lattice parameters, consequently  
 104 changing photonic properties, such as upconversion quantum efficiency.<sup>40</sup>

105

106 Synthesis of NaYF<sub>4</sub>:RE UCNPs typically creates pseudo-spherical UCNPs with a range of  
 107 diameters. For example, Sikora et al., (2013) report a Gaussian diameter distribution of UCNPs,  
 108 ranging between 15 – 70 nm.<sup>14</sup> and Haro-González et al. (2013)<sup>41</sup> report a Gaussian diameter  
 109 distribution of UCNPs UCNPs ranging from ~10 – 50 nm in diameter (see Table 1).

110

111 **Table 1.** Crystal lattice parameters of NaYF<sub>4</sub>:RE UCNPs reported in the literature.

| Study                                | NaYF <sub>4</sub> RE dopant composition (%)                          | UCNP lattice structure | a (Å) | c (Å) | Mean UCNP diameter (nm) | UCNP diameter range (nm) |
|--------------------------------------|----------------------------------------------------------------------|------------------------|-------|-------|-------------------------|--------------------------|
| Sikora et al., (2013). <sup>14</sup> | 30% Yb <sup>3+</sup> , 2% Er <sup>3+</sup>                           | Cubic                  | 5.51  | -     | ~ 30                    | 15 -70                   |
| Cao et al., 2010. <sup>15</sup>      | 20% Yb <sup>3+</sup> , 2% Er <sup>3+</sup>                           | Hexagonal              | 5.960 | 3.510 | 33 ± 1 nm               | 32 - 34 nm               |
| Wang et al., 2010. <sup>40</sup>     | 18% Yb <sup>3+</sup> , 2% Er <sup>3+</sup>                           | Hexagonal              | 5.96  | 3.53  | Not reported            | Not reported             |
| Wang et al., 2010. <sup>40</sup>     | 18% Yb <sup>3+</sup> , 2% Er <sup>3+</sup> ,<br>60% Gd <sup>3+</sup> | Hexagonal              | 6.02  | 3.60  | Not reported            | Not reported             |

112

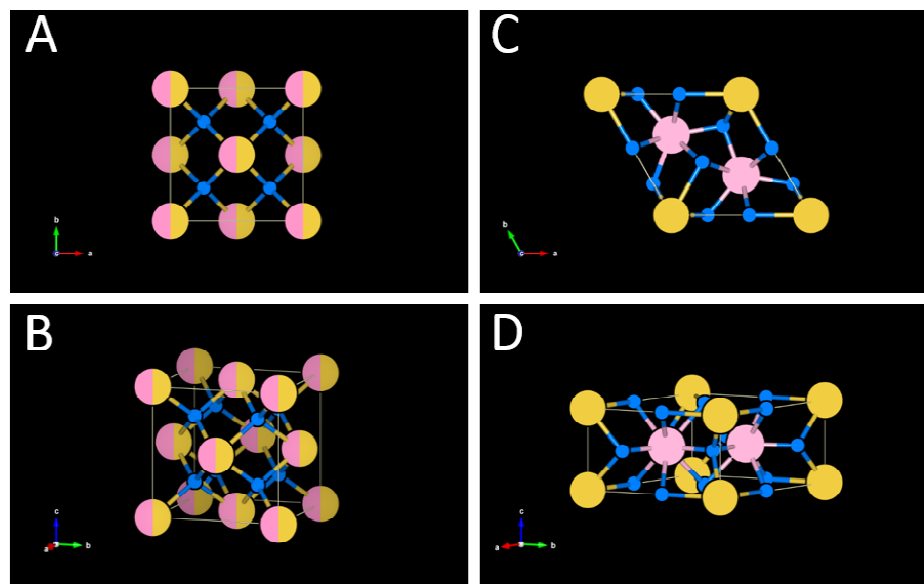

113

114

115

116

117

118

119

**Figure 1. NaYF<sub>4</sub>:RE UCNPs unit cell structures.** Colour key: Na<sup>+</sup> ions are yellow; Y<sup>3+</sup> and RE<sup>3+</sup> dopant ions are pink; F<sup>-</sup> ions are smaller and blue. **(A, B)** Cubic lattice unit cell structure. Sites that are randomly occupied by both Na<sup>+</sup> and RE<sup>3+</sup> are depicted as both pink and yellow. **(C, D)** Hexagonal lattice unit cell structure. This Figure is based upon data from Kramer et al., (2004)<sup>42</sup> and Wang et al., (2010).<sup>40</sup> Diagrams created with the open-source software package VESTA.<sup>43</sup>

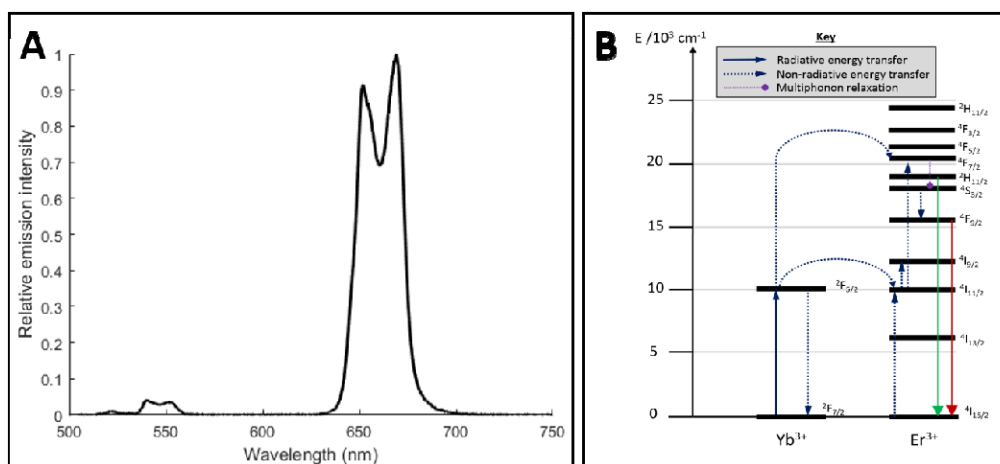

120

121

122

123

124

**Figure 2. The upconversion emission of UCNPs.** **(A)** Emission of a 1 mg/mL of NaYF<sub>4</sub>:Yb,Er UCNPs (20% Yb and 2% Er) suspended in ultra-pure water (see supplementary material for UCNP synthesis details). **(B)** Corresponding Jablonski diagram depicting the upconversion process (based upon Heer et al., (2004)).<sup>39</sup>

## 125 Estimating the number of unit cells in a UCNP

126 For the purposes of this study, we assume UCNPs to be spherical, with volume ( $V_{UCNP}$ )

127 described by:

$$V_{UCNP} = \frac{4}{3} \pi r^3, \quad (1)$$

128 where  $r$  is the radius of the UCNP. Note that non-spherical UCNP morphologies can be  
129 incorporated by modifying Equation 1 appropriately. If the UCNP consists of cubic unit cells, then  
130 the volume of an individual cubic unit cell ( $uV_{cubic}$ ) is given by:

$$uV_{cubic} = a_c^3. \quad (2)$$

131 If the UCNP consists of hexagonal unit cells, volume of a hexagonal unit cell ( $uV_{hexagonal}$ ) is given  
132 by:

$$uV_{hexagonal} = \frac{2\sqrt{3}}{4} a_h^2 c_h. \quad (3)$$

133 Where  $a_h$  and  $c_h$  are lattice parameters describing hexagonal unit cells. Thus, the number of unit  
134 cells in a UCNP (i.e.  $uN_{cubic}$  or  $uN_{hexagonal}$ ) can be estimated by:

$$uN_{cubic} = V_{UCNP} / uV_{cubic}, \quad (4)$$

$$uN_{hexagonal} = V_{UCNP} / uV_{hexagonal}. \quad (5)$$

135 This calculation assumes the effects of crystal dislocations and rounding error in the total number  
136 of unit cells to be negligible. Further, we assume that UCNPs are composed of 100% cubic or  
137 hexagonal unit cells because, to the best of our knowledge, hybrid crystal phase UCNPs have not  
138 been reported.

139

## 140 Estimating the total atomic weight within a single unit cell

141 Assuming no RE dopants, the atomic weight of a single cubic NaYF<sub>4</sub> ( $uAW_{cubic}$ ) or hexagonal  
142 NaYF<sub>4</sub> unit cell ( $uW_{hex}$ ) is described by:

$$uAW_{cubic} = (2 \times AW_{Na}) + (2 \times AW_Y) + (8 \times AW_F); \quad (6)$$

$$uAW_{hex} = (1.5 \times AW_{Na}) + (1.5 \times AW_Y) + (6 \times AW_F); \quad (7)$$

143 where  $AW_{Na}$ ,  $AW_Y$ , and  $AW_F$  are the atomic weight (Da or g/mol) of Sodium, Yttrium, and  
144 Fluorine respectively (see Table S1). We assume any mass difference due to loss of electrons due to  
145 ionisation to be negligible. If RE dopant ions are added during UCNP synthesis, then a fraction of Y<sup>3+</sup>  
146 ions are substituted for RE<sup>3+</sup> dopant ions, altering the average atomic weight of unit cells within  
147 UCNPs. This RE doping can be accounted for by defining a total additive factor ( $af$ ):

148

$$af = fRE_{d1} + fRE_{d2} \dots + fRE_{dn}, \quad (8)$$

149 where  $RE_{d1}$ ,  $fRE_{d2}$ , ...  $fRE_{dn}$  is the fractional percentage of an arbitrary number of RE dopants.  
 150 The total additive factor is a numeric value ranging between 0 and 1, representing the theoretical  
 151 extremes of 0% and 100% Y substitution respectively. Thus, total the atomic mass contained within  
 152 a single cubic or hexagonal unit cell with RE dopants is be calculated by:

153

$$uAW_{cubic RE_{Doped}} = (2 \times AW_{Na}) + (8 \times AW_F) + (2(1 - af) \times AW_Y) + \quad (9)$$

$$(2 \times fRE_{d1} \times AW_{RE_{d1}}) + (2 \times fRE_{d2} \times AW_{RE_{d2}}) + \dots + (2 \times$$

$$fRE_{dn} \times AW_{RE_{dn}});$$

$$uAW_{hexagonal RE_{Doped}} = (1.5 \times AW_{Na}) + (6 \times AW_F) + (1.5(1 - af) \times \quad (10)$$

$$W) + (1.5 \times fRE_{d1} \times AW_{RE_{d1}}) + (1.5 \times fRE_{d2} \times AW_{RE_{d2}}) + \dots +$$

$$(1.5 \times fRE_{dn} \times AW_{RE_{dn}});$$

154 where  $uAW_{cubic RE_{Doped}}$  and  $uAW_{hexagonal RE_{Doped}}$  are the average atomic weight of RE doped  
 155 cubic and hexagonal unit cells, respectively.

156

### 157 Estimating the theoretical molecular weight of a UCNP

158 Once the total number of unit cells within a UCNP ( $uN$ ) and the total atomic weight ( $uAW$ )  
 159 within each individual unit cell are estimated, the theoretical molecular weight of a cubic lattice  
 160 UCNP ( $MW_{cubic}$ ) can be estimated by summing the atomic weight contributions from all unit  
 161 cells:

$$MW_{cubic} = uAW_{cubic RE_{Doped}} \times uN_{cubic}, \quad (11)$$

$$MW_{hexagonal} = uAW_{hexagonal RE_{Doped}} \times uN_{hexagonal}. \quad (12)$$

162 From Equations 4, 5, 11, and 12, it can be seen that the molecular weight of UCNP scales  
 163 proportionally to volume, thus spherical UCNP's molecular weight will scale proportionally to the  
 164 cube of UCNP radius.

165

166

## 167 **Methods**

### 168 **Molecular weight predictions for cubic and hexagonal NaYF<sub>4</sub>:RE UCNPs**

169 Using the theory presented in Sections 2.4 – 2.6, the theoretical molecular weight of hexagonal  
170 and cubic lattice NaYF<sub>4</sub> UCNPs were calculated, assuming the following typical unit cell lattice  
171 parameters: cubic:  $a = 5.51 \text{ \AA}$ ; hexagonal:  $a = 5.91 \text{ \AA}$ ,  $c = 3.53 \text{ \AA}$ ; (see Table 1).

172

### 173 **The effect of RE doping on theoretical molecular weight**

174 The effect of RE doping was investigated by using the theory presented in Sections 2.4 – 2.6 to  
175 calculate the theoretical molecular weight of NaYF<sub>4</sub>:RE UCNPs incorporating various concentrations  
176 of Yb<sup>3+</sup> and Er<sup>3+</sup> dopant ions. We assume that UCNP lattice parameters will remain constant,  
177 neglecting the unit cell contraction effect demonstrated by Wang et al. (2010),<sup>40</sup> where UCNP unit  
178 cell lattice parameters are altered when the concentration of RE dopants is increased.<sup>40</sup>

179

### 180 **The theoretical molecular weight of UCNPs reported in the literature**

181 The theoretical molecular weight of various NaYF<sub>4</sub>:RE UCNPs reported in the literature was  
182 calculated by incorporating various lattice parameters and mol% of RE dopants from the literature  
183 into the theory presented in Sections 2.4 – 2.6.

184

### 185 **UCNP diameter distribution vs. theoretical molecular weight distribution**

186 UCNP synthesis typically produces a Gaussian distribution of UCNPs diameters. To investigate  
187 how such a distribution of UCNP diameters affects the distribution of theoretical UCNP molecular  
188 weights, the Gaussian diameter distribution data for a single batch of NaYF<sub>4</sub>:Yb,Er UCNPs was  
189 reproduced from data presented in Sikora et al (2013).<sup>14</sup> The theoretical molecular weight for each  
190 UCNP diameter in this distribution was calculated by the theory presented in Sections 2.4 – 2.6.  
191 Gaussian fits to the data were calculated by using non-linear least squares fitting in MATLAB  
192 (MATLAB 2016a, MathWorks).

193

### 194 **Stand-alone GUIs for calculation of nanoparticle theoretical molecular weight**

195 Two stand-alone executable graphic user interfaces (GUIs) were created in MATLAB to enable  
196 rapid calculation of UCNP theoretical molecular weight. Each GUI incorporates different features  
197 and assumptions. The first, more simple, GUI was developed to enable other researchers to  
198 calculate the theoretical molecular weight of spherical NaYF<sub>4</sub>:RE UCNPs for a user-defined  
199 nanoparticle size range. The second, more powerful, GUI was designed to enable users to estimate  
200 the theoretical molecular weight of crystalline nanoparticles with arbitrary nanoparticle geometry;



201 arbitrary lattice parameters; and arbitrary elemental composition, across a user-defined range of  
202 characteristic nanoparticle sizes. Additional technical information for both GUIs is provided in the  
203 supplementary material section. The stand-alone GUIs developed are shown in supplemental  
204 Figures S1 and S2. These GUIs are freely available from the University of Leeds Research Data  
205 Depository and are attributed with their own citable DOI (<https://doi.org/10.5518/173>).<sup>44</sup>

206

## 207 Results

### 208 Theoretical molecular weight of cubic and hexagonal NaYF<sub>4</sub>:RE UCNPs

209 Hexagonal lattice UCNPs have a greater theoretical molecular weight than cubic lattice UCNPs  
210 (see Figure 3); this is due to the lower volume of hexagonal unit cells, and correspondingly higher  
211 density of hexagonal lattice UCNPs. Additionally, because molecular weight scales to UCNP volume,  
212 relatively small changes in UCNP diameter increased molecular weight considerably: e.g. a 20 nm  
213 cubic UCNP has a molecular weight of ~10 MDa, whereas a 30 nm UCNP has a molecular weight of  
214 > 30 MDa (an increase of 20 MDa for a 5 nm change in UCNP diameter).

215

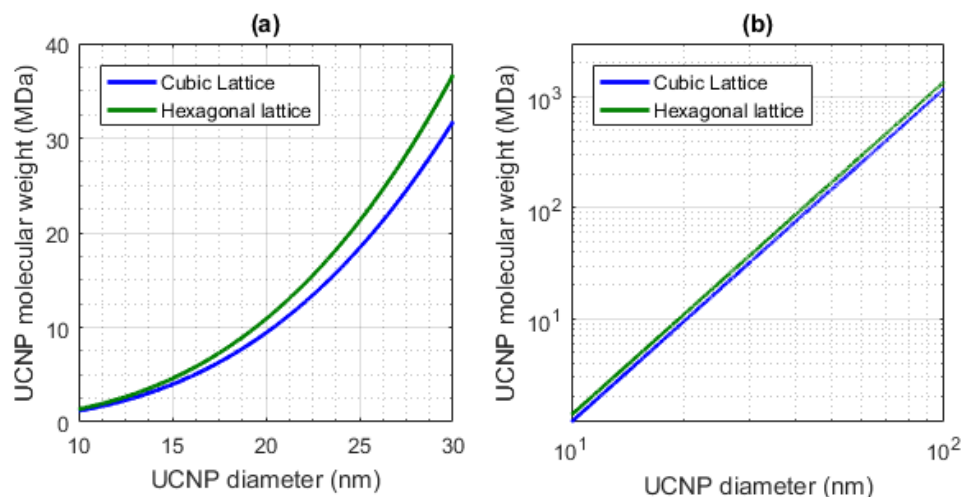

216

217

218 **Figure 3. Diameter versus theoretical molecular weight for hexagonal and cubic**  
219 **NaYF<sub>4</sub> UCNPs (green and blue respectively). (a) UCNP diameter vs. molecular**  
220 **weight on a standard x-axis. (b) The same data plotted with a logarithmic scale.**  
221 Lattice parameters were assumed to be:  $a = 5.51 \text{ \AA}$  for cubic UCNPs;  $a, c = 5.91 \text{ \AA}$   
222 and  $3.53 \text{ \AA}$  for hexagonal UCNPs.

223

## 224 The effect of RE doping on UCNP molecular weight

225 Increasing  $\text{Yb}^{3+}$  or  $\text{Er}^{3+}$  dopant % increased the theoretical molecular weight of UCNPs (see  
226 Figure 4) because  $\text{Yb}^{3+}$  and  $\text{Er}^{3+}$  have a greater atomic mass than  $\text{Y}^{3+}$ . However, the difference in  
227 theoretical molecular weight between UCNPs doped with  $\text{Yb}^{3+}$  and  $\text{Er}^{3+}$  was relatively small to the  
228 small difference between the atomic weight of  $\text{Yb}^{3+}$  and  $\text{Er}^{3+}$  (173.054 and 167.259 g/mol  
229 respectively, see Table S1). Hexagonal lattice UCNPs show a slightly higher increase in theoretical  
230 molecular weight for a given dopant concentration than cubic lattice UCNPs because hexagonal  
231 lattice UCNPs have a greater unit cell density compared to their cubic counterparts.

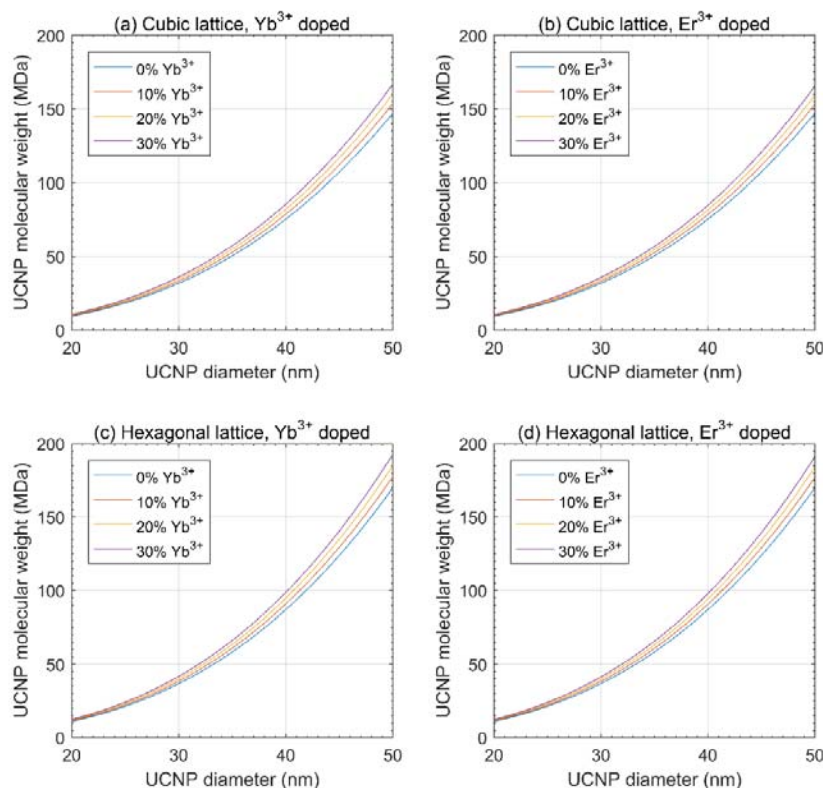

232

233 **Figure 4. The effect of RE doping on theoretical UCNP molecular weight. (a, b)**

234 theoretical molecular weight vs. RE dopant mol% for cubic lattice UCNPs. (c, d)

235 theoretical molecular weight vs. RE dopant mol% for hexagonal lattice UCNPs.

236 Calculations assume that lattice parameters are  $a = 5.51 \text{ \AA}$  for cubic lattice UCNPs,

237  $a = 5.91 \text{ \AA}$ ;  $c = 3.53 \text{ \AA}$  for hexagonal lattice UCNPs, and that lattice parameters are

238 independent of dopant mol%.

239

240

241 **The theoretical molecular weight of NaYF<sub>4</sub>:RE UCNPs reported in the literature**

242 The theoretical molecular weight of various NaYF<sub>4</sub>:RE UCNPs reported in the literature are  
243 shown in Figure 5.

244

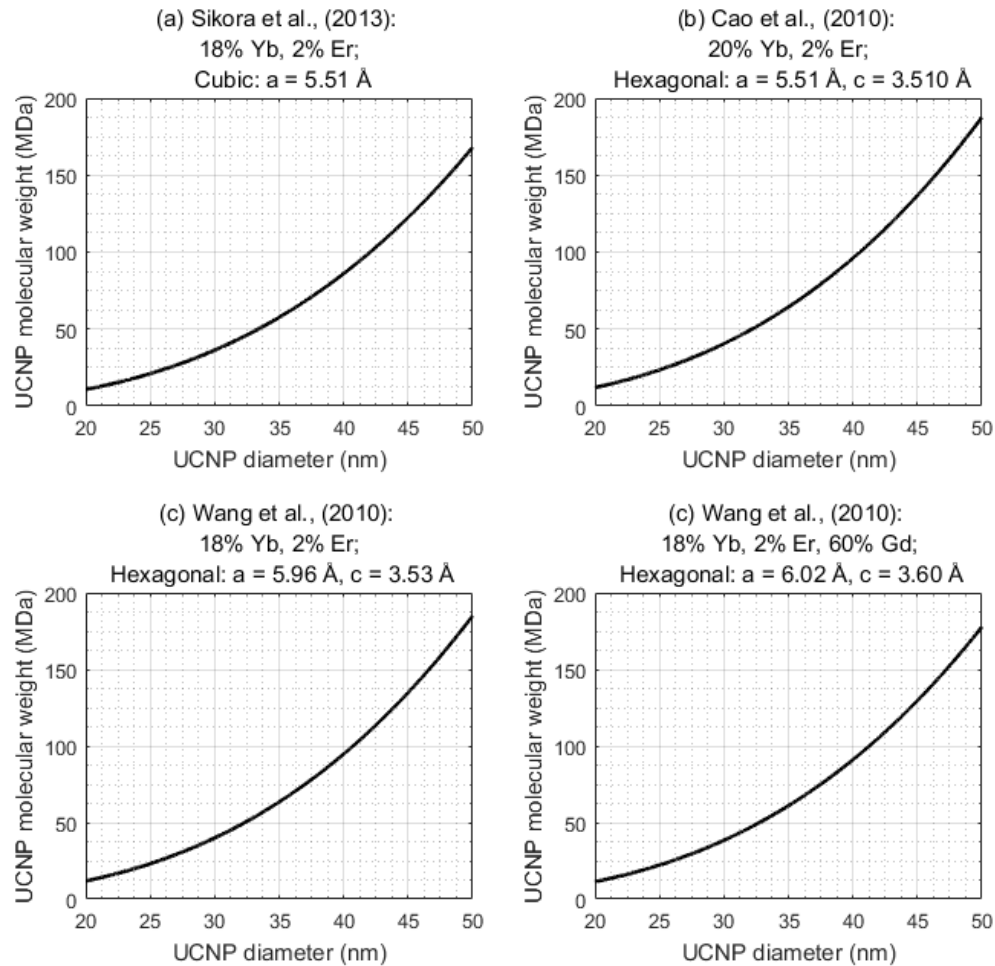

245

246 **Figure 5. Theoretical molecular weight of various UCNPs reported in the**  
247 **literature. (a) Sikora et al., (2013).<sup>14</sup> (b) Cao et al., (2010).<sup>15</sup> (c, d) Wang et al.,**  
248 **(2010).<sup>40</sup>**

249

## 250 UCNP diameter distribution vs. theoretical molecular weight distribution

251 The UCNP diameter distribution data from Sikora et al., (2013)<sup>14</sup> was well-fitted by a Gaussian  
252 distribution ( $R^2 = 0.96$ ) (see Figure 6a). The corresponding theoretical molecular weight distribution  
253 (shown in Figure 6b), demonstrates the exponential relation between UCNP diameter and UCNP  
254 molecular weight distribution. Plotted on a logarithmic x-axis scale (Figure 6c), the resulting  
255 molecular weight distribution was well fitted by a Gaussian distribution ( $R^2 = 0.98$ ), indicating that  
256 the molecular weight distribution corresponding to a Gaussian diameter distribution is lognormal.

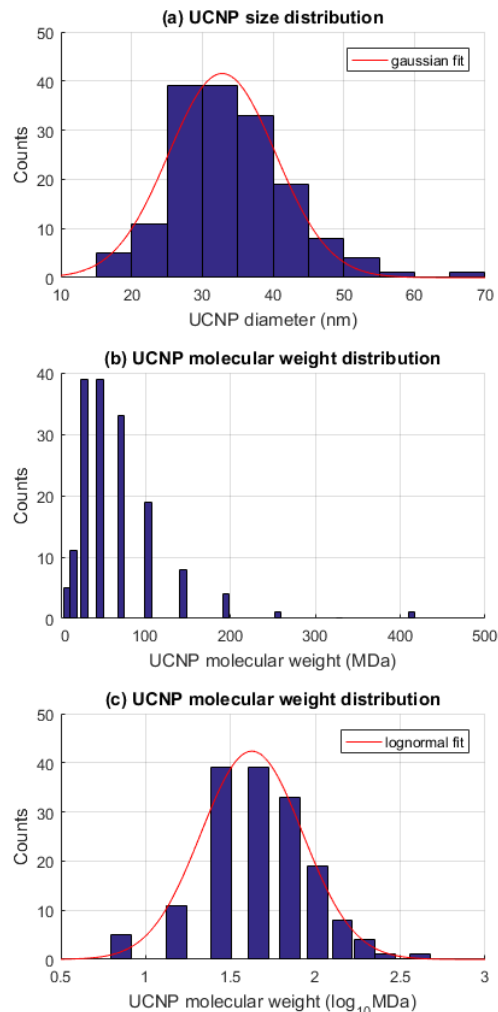

257

## 258 Figure 6. Gaussian UCNP diameter distributions give rise to lognormal

259 distribution of theoretical molecular weights. (a) A Gaussian diameter distribution

260 of UCNPs is well described by a normal distribution ( $R^2 = 0.96$ ). (b) The

261 corresponding theoretical molecular weight distribution of UCNPs on a linear

262 molecular weight scale. (c) The molecular weight distribution on a logarithmic x-axis

263 is well fitted by a lognormal distribution ( $R^2 = 0.98$ ).

## 264 Discussion

265 We have provided a theory to estimate the molecular weight of UCNPs. Our theory is required  
266 because, to the best of our knowledge, there are no experimental techniques measuring the  
267 molecular weight of UCNPs, which we predict will be > 5 MDa for UCNPs ~15 nm in diameter, and  
268 100 MDa for UCNPs ~45 nm in diameter. Mass spectrometry is limited to molecules < 40 kDa, and  
269 svAUC is limited to measurements of macromolecules < 5 MDa.<sup>34</sup> Our theory predicts that UCNPs  
270 with a molecular weight of < 5 MDa would be < 15 nm in diameter. To the best of our knowledge  
271 monodisperse synthesis of such small UCNPs has not been reported in the literature.

272

273 Despite the aforementioned challenges of experimental verification, we attempted svAUC  
274 measurements of UCNPs, because successful svAUC studies of other types of nanoparticles (e.g.  
275 SiO<sub>2</sub> nanoparticles) with unknown molecular weight have been reported.<sup>45,46</sup> If accurate svAUC  
276 measurements of UCNPs could be made, then UCNP molecular weight could potentially be  
277 calculated by the theory described by Carney et al., (2011),<sup>34</sup> which is based upon accurate  
278 quantification of sedimentation and diffusion coefficients from svAUC measurements, and which  
279 has been verified for gold nanoparticles ~2 MDa in molecular weight. The full details of the method  
280 of our svAUC experiment are provided in the supplementary information. However, our svAUC  
281 experiment studying UCNPs was not successful. In brief, our svAUC results showed that the UCNPs  
282 (diameter = 32 ± 5 nm, average theoretical molecular weight of ~ 43 MDa) sedimented very rapidly,  
283 even at low centrifuge rotor speeds (3,000 rpm), limiting the amount of useable data. At higher  
284 rotor speeds UCNPs sedimented too rapidly for data collection. When the recovered sedimentation  
285 coefficient was extrapolated to zero sample concentration, a negative sedimentation coefficient  
286 was returned. Additionally, UCNPs were observed to diffuse considerably, further complicating AUC  
287 experiments. This unusual behaviour is not typical of the nanoclusters and gold nanoparticles used  
288 to demonstrated the molecular weight estimation technique described by Carney et al., (2011),<sup>34</sup>  
289 and as such UCNP molecular weight could not be estimated by svAUC. The challenges associated  
290 with svAUC measurement of UCNPs serve to further highlight the need for a method to estimate  
291 the molecular weight of UCNPs theoretically.

292

293 Although it has not been possible for us to experimentally validate our estimates of UCNP  
294 molecular weight, it may be possible in future to verify some limited predictions of our theory. For  
295 example, it may be possible to measure the difference in bulk densities of cubic and hexagonal  
296 UCNPs and compare this with predictions from our theory. However, we could not attempt this

297 measurement because we did not have access to the high temperature crucible equipment  
298 required for hexagonal UCNP synthesis.<sup>40</sup>

299

300 Despite this lack of current and direct experimental verification, we can be reasonably confident  
301 in the accuracy of our theory because it stems directly from the theory of crystallography, which  
302 has been a subject of intense study in the past century,<sup>47</sup> combined with empirical measurements  
303 of UCNP crystal structure.

304

305 Our method to calculate the theoretical molecular weight of NaYF<sub>4</sub>:RE UCNPs relies on two basic  
306 assumptions: 1. that UCNPs are crystals of homogenous elemental composition and unit cell phase,  
307 and 2. that the lattice parameters and diameter data utilized is accurate. These assumptions can be  
308 verified by TEM and XRD measurements of UCNP crystal structure. Ensuring accurate lattice  
309 parameters is particularly important when estimating the molecular weight of UCNPs with  
310 arbitrarily large dopant concentrations. For example, Wang et al., (2010)<sup>40</sup> experimentally  
311 demonstrated that by doping a hexagonal phase NaYF<sub>4</sub>:Yb,Er UCNP (18% Yb, 2% Er) with increasing  
312 concentrations of Gd<sup>3+</sup> increases the lattice parameters of the UCNP significantly, resulting in an  
313 increased unit cell volume. Thus, because of this dependence of lattice parameter on RE dopant  
314 percentage, our estimations of UCNP molecular weight in Figure 3 may be an over-estimation on  
315 true values if lattice parameters are not independently verified for each RE dopant concentration  
316 of interest. UCNP volume/morphology also influences theoretical UCNP molecular weight. We  
317 recommend using TEM to directly quantify UCNP morphology with limited assumptions. Other  
318 techniques such as such as dynamic light scattering (DLS) and nanoparticle tracking analysis can be  
319 used to estimate the equivalent hydrodynamic radius of nanoparticles but incorporate various  
320 assumptions into calculations.<sup>46,48</sup> As such, direct TEM imaging of UCNPs is preferable to ensure  
321 theoretical molecular weight is as accurate as possible. In this study we assumed UCNPs are  
322 perfectly spherical, but our method could be trivially adapted for arbitrary nanoparticle  
323 geometries; e.g. rods,<sup>40,49</sup> triangular,<sup>50</sup> or prism-shaped<sup>51</sup> nanoparticles, and for nanoparticles of  
324 varying crystalline composition. The extension of our technique to arbitrary geometries, arbitrary  
325 crystal lattice parameters, and arbitrary elemental composition is demonstrated by the  
326 development and application of an advanced GUI incorporating all of these variables (see Figure  
327 S2). Our theory does not account for any dislocations in the regular UCNP crystal structure. Instead  
328 we assume the influence of any such dislocations to be negligible compared to the molecular  
329 weight of whole UCNPs. Our theory also does not account for any surface functionalisation with  
330 amorphous layers or other molecules. Thus the molecular weight of UCNPs modified by addition of

331 a silica<sup>8,35,52</sup> or calcium fluoride<sup>53</sup> shell coating will be greater than the theoretical molecular weight  
332 estimated by our technique.

333

334 It should be noted that a simple theory for estimation of the molecular weight of a single  
335 homogenous gold nanoparticle based upon bulk density of materials was proposed by Lewis et al.  
336 (2006).<sup>54</sup> However, this simple theory did not account for crystalline unit cell parameters or  
337 elemental doping. Further, their theory was not extended to describe the molecular weight  
338 distributions of a population of nanoparticles. Our results demonstrate that a Gaussian distribution  
339 of UCNP diameters corresponds to a lognormal distribution in molecular weight (as shown in Figure  
340 6). Mathematically, it is reasonable to expect similar logarithmic relations between UCNP diameter  
341 and molecular weight for arbitrary diameter distributions. Such molecular weight distributions may  
342 of consequence when studying behaviour of UCNP populations, because minor outliers in UCNP  
343 diameter will be extreme outliers in terms of molecular weight.

344

345 Estimation of molecular weight of NaYF<sub>4</sub>:RE UCNPs will likely be of utility in various applications,  
346 particularly in biomedical imaging, biosensing, and therapeutics. Knowledge of UCNP molecular  
347 weight will likely be of great utility in studies where UCNP surfaces are functionalised with  
348 additional molecules, e.g. antibodies<sup>6-8,25</sup> or oligonucleotides,<sup>33</sup> because if the molecular weight of  
349 UCNPs is known, then the molar concentrations of substances in the functionalisation processes  
350 can be determined. When combined with estimation of UCNP surface area, this could inform the  
351 UCNP functionalisation for biosensing applications. Knowledge of UCNP molecular weight would  
352 also be beneficial in the processing of particles for downstream applications. In particular, steps  
353 taken to functionalise the nanoparticles may require separation procedures to remove unreacted  
354 moieties or unwanted reactants. If the molecular weight of UCNPs were known, then it may be  
355 beneficial for the optimisation of conjugation stoichiometry, which can be concentration  
356 dependant; the reaction rates of UCNPs will be heavily influenced by their molecular weight; thus a  
357 greater understanding of their molecular weight may increase the knowledge of thermodynamic  
358 properties of UCNP systems. This is particularly important when considering the use of bio-  
359 receptors with UCNPs where the mass of the particle may affect the binding kinetics of the UCNP-  
360 receptor construct.

361 The molecular weight of UCNPs will also be of interest in the study of cytotoxicity, bio-  
362 distribution, cellular uptake, metabolism, and excretion of UCNPs in biological systems.<sup>12,14</sup>  
363 Currently, it is extremely challenging to compare the results from various imaging and therapeutic  
364 studies because UCNP concentration is reported as weight of UCNPs per volume of aqueous media

365 (i.e. mg/mL or similar).<sup>12</sup> This is a crude measure which does not quantify number of UCNPs in a  
366 given sample. For example, nanoparticles can induce membrane damage<sup>55</sup> and initiate apoptosis  
367 (programmed cell-death).<sup>56,57</sup> Reporting the molar concentration of UCNPs would help assessment  
368 of UCNP cytotoxic effects. A standardised protocol based on molecular weight of UCNPs would help  
369 assessment of accumulation of UCNPs *in vivo* and their clearance time from organs<sup>13</sup> or tumours.<sup>53</sup>  
370 Reporting the molar concentration of UCNP composites may also help to develop highly-localised  
371 targeted delivery of therapeutic drugs to the required sites in the body, leading to better controlled  
372 targeted photodynamic therapy,<sup>27</sup> and potential improvements in targeted drug delivery.<sup>16</sup>

## 373 Conclusions

374 We have provided a method to estimate the theoretical molecular weight of UCNPs. This theory  
375 is based upon UCNP crystal parameters which can be measured for batches of UCNPs by TEM and  
376 XRD techniques. The theory presented here is generalizable to other crystalline nanoparticles  
377 where the relevant crystalline lattice parameters are known, i.e. nanoparticle unit cell elemental  
378 composition, unit cell size parameters, and nanoparticle morphology. To enhance dissemination of  
379 our theory we provide two stand-alone GUIs for calculation of the molecular weight of both UCNPs  
380 and arbitrary crystalline nanoparticles respectively. We could not, however, experimentally verify  
381 our predictions of UCNP molecular weight with mass spectrometry or *svAUC*. We did attempt  
382 *svAUC* experiments but could not recover reliable *svAUC* data because UCNPs were observed to  
383 sediment and diffuse rapidly. Nevertheless, our theory provides some key predications about the  
384 molecular weight of UCNPs. Firstly, that the theoretical molecular weight of UCNPs scales with  
385 volume of the nanoparticle. As an example, we predict that a spherical UCNP ~10 nm diameter will  
386 have a molecular weight of ~1 MDa ( $10^6$  g/mol), whereas a UCNP ~ 45 nm in diameter will be ~100  
387 MDa ( $10^8$  g/mol). From this relation, we find that a Gaussian distribution of nanoparticle diameters  
388 corresponds to a lognormal distribution of UCNPs molecular weights, and that a small change in  
389 UCNP diameter distribution can potentially represent a large change in overall UCNP molecular  
390 weight. We also report that Hexagonal crystal lattice phase UCNPs will be of greater molecular  
391 weight than cubic lattice phase UCNPs, and that increasing RE dopant % will increase UCNP  
392 molecular weight.

393 We expect that the knowledge of UCNP molecular weight will be of utility in a wide variety of  
394 biomedical applications, as UCNP concentrations can now be reported in terms of molarity or  
395 absolute number of UCNPs instead of the relatively crude measure of sample weight. This will likely  
396 aid inter-study comparison of both UCNP dosage and improve methods for creating UCNP  
397 biosensors.



398

## 399 References

- 400 1. Zhou, J., Xu, S., Zhang, J. & Qiu, J. Upconversion luminescence behavior of single  
401 nanoparticles. *Nanoscale* **7**, (2015).
- 402 2. Hyppänen, I., Höysniemi, N., Arppe, R., Schaeferling, M. & Soukka, T. Environmental Impact  
403 on the Excitation Path of the Red Upconversion Emission of Nanocrystalline NaYF<sub>4</sub>:Yb<sup>3+</sup>,Er  
404 <sup>3+</sup>. *J. Phys. Chem. C* **acs.jpcc.7b01019** (2017). doi:10.1021/acs.jpcc.7b01019
- 405 3. Plohl, O. *et al.* Optically Detected Degradation of NaYF<sub>4</sub>: Yb, Tm Based Upconversion  
406 Nanoparticles in Phosphate Buffered Saline Solution. *Langmuir* **acs.langmuir.6b03907**  
407 (2016). doi:10.1021/acs.langmuir.6b03907
- 408 4. Chen, F., Bu, W., Cai, W. & Shi, J. Functionalized upconversion nanoparticles: versatile  
409 nanoplatforms for translational research. *Curr. Mol. Med.* **13**, 1613–32 (2013).
- 410 5. Wang, F., Banerjee, D., Liu, Y., Chen, X. & Liu, X. Upconversion nanoparticles in biological  
411 labeling, imaging, and therapy. *Analyst* **135**, 1839–1854 (2010).
- 412 6. Tang, J., Lei, L., Feng, H., Zhang, H. & Han, Y. Preparation of K<sup>+</sup>-Doped Core-Shell NaYF<sub>4</sub>:Yb,  
413 Er Upconversion Nanoparticles and its Application for Fluorescence  
414 Immunochromatographic Assay of Human Procalcitonin. *J. Fluoresc.* **26**, 2237–2246 (2016).
- 415 7. Lei, L. *et al.* A rapid and user-friendly assay to detect the Neutrophil gelatinase-associated  
416 lipocalin (NGAL) using up-converting nanoparticles. *Talanta* **162**, 339–344 (2017).
- 417 8. Jo, E. J., Mun, H. & Kim, M. G. Homogeneous Immunosensor Based on Luminescence  
418 Resonance Energy Transfer for Glycated Hemoglobin Detection Using Upconversion  
419 Nanoparticles. *Anal. Chem.* **88**, 2742–2746 (2016).
- 420 9. Doughan, S., Uddayasankar, U. & Krull, U. J. *A paper-based resonance energy transfer*  
421 *nucleic acid hybridization assay using upconversion nanoparticles as donors and quantum*  
422 *dots as acceptors.* *Analytica Chimica Acta* **878**, (Elsevier B.V., 2015).
- 423 10. Zhang, S. *et al.* Fluorescence resonance energy transfer between NaYF<sub>4</sub>:Yb,Tm upconversion  
424 nanoparticles and gold nanorods: Near-infrared responsive biosensor for streptavidin. *J.*  
425 *Lumin.* **147**, 278–283 (2014).
- 426 11. Mader, H. S., Kele, P., Saleh, S. M. & Wolfbeis, O. S. Upconverting luminescent nanoparticles  
427 for use in bioconjugation and bioimaging. *Curr. Opin. Chem. Biol.* **14**, 582–596 (2010).
- 428 12. Gnach, A., Lipinski, T., Bednarkiewicz, A., Rybka, J. & Capobianco, J. a. Upconverting  
429 nanoparticles: assessing the toxicity. *Chem. Soc. Rev. Chem. Soc. Rev* **44**, 1561–1584 (2015).
- 430 13. Zou, R. *et al.* Silica shell-assisted synthetic route for mono-disperse persistent  
431 nanophosphors with enhanced in vivo recharged near-infrared persistent luminescence.

- 432 *Nano Res.* (2017). doi:10.1007/s12274-016-1396-z
- 433 14. Sikora, B. *et al.* Transport of NaYF<sub>4</sub>:Er<sup>3+</sup>, Yb<sup>3+</sup> up-converting nanoparticles into HeLa cells.  
434 *Nanotechnology* **24**, 235702 (2013).
- 435 15. Cao, T. *et al.* Water-soluble NaYF<sub>4</sub>:Yb/Er upconversion nanophosphors: Synthesis,  
436 characteristics and application in bioimaging. *Inorg. Chem. Commun.* **13**, 392–394 (2010).
- 437 16. Ma, Y. *et al.* Labeling and long-term tracking of bone marrow mesenchymal stem cells in  
438 vitro using NaYF<sub>4</sub>:Yb<sup>3+</sup>,Er<sup>3+</sup> upconversion nanoparticles. *Acta Biomater.* **42**, 199–208  
439 (2016).
- 440 17. Kostiv, U. *et al.* RGDS- and TAT-Conjugated Upconversion of NaYF<sub>4</sub>:Yb<sup>3+</sup>/Er<sup>3+</sup>&SiO<sub>2</sub>  
441 Nanoparticles: In Vitro Human Epithelioid Cervix Carcinoma Cellular Uptake, Imaging, and  
442 Targeting. *ACS Appl. Mater. Interfaces* **8**, 20422–20431 (2016).
- 443 18. Shi, Y. *et al.* Stable Upconversion Nanohybrid Particles for Specific Prostate Cancer Cell  
444 Immunodetection. *Nat. Publ. Gr.* 1–11 (2016). doi:10.1038/srep37533
- 445 19. Rao, L. *et al.* Erythrocyte Membrane-Coated Upconversion Nanoparticles with Minimal  
446 Protein Adsorption for Enhanced Tumor Imaging. *Appl. Mater. Interfaces* 2159–2168 (2017).  
447 doi:10.1021/acsami.6b14450
- 448 20. Hu, G. *et al.* Upconversion Nanoparticles and Monodispersed Magnetic Polystyrene  
449 Microsphere Based Fluorescence Immunoassay for the Detection of Sulfaquinolaxine in  
450 Animal-Derived Foods. *J. Agric. Food Chem.* **64**, 3908–3915 (2016).
- 451 21. Dai, S., Wu, S., Duan, N. & Wang, Z. A luminescence resonance energy transfer based  
452 aptasensor for the mycotoxin Ochratoxin A using upconversion nanoparticles and gold  
453 nanorods. *Microchim. Acta* **183**, 1909–1916 (2016).
- 454 22. Guo, X., Wu, S., Duan, N. & Wang, Z. Mn<sup>2+</sup>-doped NaYF<sub>4</sub>:Yb/Er upconversion  
455 nanoparticle-based electrochemiluminescent aptasensor for bisphenol A. *Anal. Bioanal.*  
456 *Chem.* **408**, 3823–3831 (2016).
- 457 23. Chen, Q., Hu, W., Sun, C., Li, H. & Ouyang, Q. Synthesis of improved upconversion  
458 nanoparticles as ultrasensitive fluorescence probe for mycotoxins. *Anal. Chim. Acta* **938**,  
459 137–145 (2016).
- 460 24. Fu, X., Chen, L. & Choo, J. Optical Nanoprobes for Ultrasensitive Immunoassay. *Anal. Chem.*  
461 **1**, 124–137 (2016).
- 462 25. Gao, N., Ling, B., Gao, Z., Wang, L. & Chen, H. Near-infrared-emitting NaYF<sub>4</sub>:Yb,Tm/Mn  
463 upconverting nanoparticle/gold nanorod electrochemiluminescence resonance energy  
464 transfer system for sensitive prostate-specific antigen detection. *Anal. Bioanal. Chem.*  
465 (2017). doi:10.1007/s00216-017-0212-2

- 466 26. Juntunen, E. *et al.* Effects of blood sample anticoagulants on lateral flow assays using  
467 luminescent photon-upconverting and Eu(III) nanoparticle reporters. *Anal. Biochem.* **492**,  
468 13–20 (2016).
- 469 27. Liang, L. *et al.* Facile Assembly of Functional Upconversion Nanoparticles for Targeted  
470 Cancer Imaging and Photodynamic Therapy. *ACS Appl. Mater. Interfaces* **8**, acsami.6b00713  
471 (2016).
- 472 28. Yang, X. *et al.* Synthesis of a core/satellite-like multifunctional nanocarrier for pH- and NIR-  
473 triggered intracellular chemothermal therapy and tumor imaging. *RSC Adv.* **7**, 7742–7752  
474 (2017).
- 475 29. Geitenbeek, R. G. *et al.* NaYF<sub>4</sub>:Er<sup>3+</sup>, Yb<sup>3+</sup>/SiO<sub>2</sub> Core/Shell Upconverting Nanocrystals for  
476 Luminescence Thermometry up to 900 K. *J. Phys. Chem. C* acs.jpcc.6b10279 (2017).  
477 doi:10.1021/acs.jpcc.6b10279
- 478 30. Zheng, K., Zhao, D., Zhang, D., Liu, N. & Qin, W. Temperature-dependent six-photon  
479 upconversion fluorescence of Er<sup>3+</sup>. *J. Fluor. Chem.* **132**, 5–8 (2011).
- 480 31. Shao, W. *et al.* A core–multiple shell nanostructure enabling concurrent upconversion and  
481 quantum cutting for photon management. *Nanoscale* **11**, 11081–11095 (2017).
- 482 32. Li, F.-C. & Kitamoto, Y. Fabrication of UCNPs/TiO<sub>2</sub> aerogel photocatalyst to improve  
483 photocatalytic performance. **20013**, 20013 (2017).
- 484 33. Park, Y. II *et al.* Facile Coating Strategy to Functionalize Inorganic Nanoparticles for  
485 Biosensing. *Bioconjug. Chem.* (2016). doi:10.1021/acs.bioconjchem.6b00524
- 486 34. Carney, R. P. *et al.* Determination of nanoparticle size distribution together with density or  
487 molecular weight by 2D analytical ultracentrifugation. *Nat. Commun.* **2**, 335 (2011).
- 488 35. Arppe, R. *et al.* Quenching of the upconversion luminescence of NaYF<sub>4</sub>:Yb<sup>3+</sup>, Er<sup>3+</sup> and NaYF<sub>4</sub>  
489 :Yb<sup>3+</sup>, Tm<sup>3+</sup> nanophosphors by water: the role of the sensitizer Yb<sup>3+</sup> in non-radiative  
490 relaxation. *Nanoscale* **7**, 11746–11757 (2015).
- 491 36. Cong, T. *et al.* Upconversion luminescence enhancement in NaYF<sub>4</sub>: Yb<sup>3+</sup>, Er<sup>3+</sup> nanoparticles  
492 induced by Cd<sup>2+</sup> tridoping. *Mater. Res. Bull.* (2017). doi:10.1016/j.materresbull.2017.02.032
- 493 37. Haase, M. & Schäfer, H. Upconverting nanoparticles. *Angew. Chemie - Int. Ed.* **50**, 5808–  
494 5829 (2011).
- 495 38. Menyuk, N., Dwight, K. & Pierce, J. W. NaYF<sub>4</sub>: Yb,Er - An efficient upconversion phosphor.  
496 *Appl. Phys. Lett.* **21**, 159–161 (1972).
- 497 39. Heer, S., Kömpe, K., Güdel, H. U. & Haase, M. Highly efficient multicolour upconversion  
498 emission in transparent colloids of lanthanide-doped NaYF<sub>4</sub> nanocrystals. *Adv. Mater.* **16**,  
499 2102–2105 (2004).

- 500 40. Wang, F. *et al.* Simultaneous phase and size control of upconversion nanocrystals through  
501 lanthanide doping. *Nature* **463**, 1061–1065 (2010).
- 502 41. Haro-González, P. *et al.* Optical trapping of NaYF<sub>4</sub>:Er<sup>3+</sup>,Yb<sup>3+</sup> upconverting fluorescent  
503 nanoparticles. *Nanoscale* **5**, 12192–9 (2013).
- 504 42. Krämer, K. W. *et al.* Hexagonal Sodium Yttrium Fluoride Based Green and Blue Emitting  
505 Upconversion Phosphors. *Chem. Mater.* **16**, 1244–1251 (2004).
- 506 43. Momma, K. & Izumi, F. VESTA 3 for three-dimensional visualization of crystal, volumetric  
507 and morphology data. *J. Appl. Crystallogr.* **44**, 1272–1276 (2011).
- 508 44. MacKenzie, L. E. Graphic User Interfaces for the calculation of nanoparticle molecular  
509 weight. (2017). doi:<https://doi.org/10.5518/173>
- 510 45. Mittal, V., Völkel, A. & Cölfen, H. Analytical ultracentrifugation of model nanoparticles:  
511 Comparison of different analysis methods. *Macromol. Biosci.* **10**, 754–762 (2010).
- 512 46. Wohlleben, W. Validity range of centrifuges for the regulation of nanomaterials: From  
513 classification to as-tested coronas. *J. Nanoparticle Res.* **14**, (2012).
- 514 47. Bragg, W. H. & Bragg, W. L. The Reflections of X-rays by Crystals. *Proc. R. Soc. A1* **88**, 428–  
515 438 (913).
- 516 48. Domingos, R. F. *et al.* Characterizing manufactured nanoparticles in the environment:  
517 Multimethod determination of particle sizes. *Environ. Sci. Technol.* **43**, 7277–7284 (2009).
- 518 49. Na, H., Woo, K., Lim, K. & Jang, H. S. Rational morphology control of β-NaYF<sub>4</sub>:Yb,Er/Tm  
519 upconversion nanophosphors using a ligand, an additive, and lanthanide doping. *Nanoscale*  
520 **5**, 4242–51 (2013).
- 521 50. Jia, H., Xu, W., An, J., Li, D. & Zhao, B. A simple method to synthesize triangular silver  
522 nanoparticles by light irradiation. **64**, 956–960 (2006).
- 523 51. Shan, J., Uddi, M., Wei, R., Yao, N. & Ju, Y. The Hidden Effects of Particle Shape and Criteria  
524 for Evaluating the Upconversion Luminescence of the Lanthanides Doped Nanophosphors. *J.*  
525 *Phys. Chem. C* **114**, 2452–2461 (2010).
- 526 52. Lü, Q., Guo, F., Sun, L., Li, A. & Zhao, L. Silica/titania-coated Y<sub>2</sub>O<sub>3</sub>: Tm<sup>3+</sup>, Yb<sup>3+</sup>  
527 nanoparticles with improvement in upconversion luminescence induced by different  
528 thickness shells. *J. Appl. Phys.* **103**, (2008).
- 529 53. Li, H., Hao, S., Yang, C. & Chen, G. Synthesis of Multicolor Core/Shell  
530 NaLuF<sub>4</sub>:Yb<sup>3+</sup>/Ln<sup>3+</sup>@CaF<sub>2</sub> Upconversion Nanocrystals. *Nanomaterials* **7**, 34 (2017).
- 531 54. Lewis, D. J., Day, T. M., MacPherson, J. V. & Pikramenou, Z. Luminescent nanobeads:  
532 attachment of surface reactive Eu(III) complexes to gold nanoparticles. *Chem. Commun.*  
533 1433–1435 (2006). doi:10.1039/B518091K

- 534 55. Nel, A. E. *et al.* Understanding biophysicochemical interactions at the nano-bio interface.  
535 *Nat. Mater.* **8**, 543–557 (2009).
- 536 56. Bexiga, M. G. *et al.* Cationic nanoparticles induce caspase 3-, 7- and 9-mediated cytotoxicity  
537 in a human astrocytoma cell line. *Nanotoxicology* **5**, 557–567 (2011).
- 538 57. Hou, Z. *et al.* UV-Emitting Upconversion-Based TiO<sub>2</sub> Photosensitizing Nanoplatform: Near-  
539 Infrared Light Mediated *in Vivo* Photodynamic Therapy via Mitochondria-Involved Apoptosis  
540 Pathway. *ACS Nano* **9**, 2584–2599 (2015).

541

## 542 **Acknowledgements**

543 The authors would like to extend a special thanks to Amy Barker (School of Molecular and  
544 Cellular Biology, University of Leeds) for her technical assistance and expertise in conducting and  
545 analysing AUC experiments. We are also grateful to Professor Peter Stockley (School of Molecular  
546 and Cellular Biology, University of Leeds) for granting access to the AUC facilities.

547

## 548 **Funding Acknowledgements**

- 549 • L.E. MacKenzie was supported by a grant from the Biotechnology and Biological Sciences  
550 Research Council Tools and Development Resources Fund (BBSRC TDRF) (BB/N021398/1).
- 551 • J.A. Good is supported by a grant from the Medical Research Council (MRC) (MR/N029976/1).
- 552 • A. Vakurov was supported by a grant from the Natural Environment Research Council (NERC).  
553 (NE/N007581/1).
- 554 • Padmaja P. Nampi is supported by a European Commission Marie Skłodowska-Curie Individual  
555 Fellowship for Experienced Researchers (H2020-MSCA-IF-2015).

## 556 **Competing financial interest statement**

557 The authors declare no competing financial interests

## 558 **Author contributions statement**

- 559 • L.E.M and J.A.G. conceived the research concept and wrote the manuscript.
- 560 • L.E.M. performed all calculations, provided Figures 2, 3, 4, 5, 6, and created the stand-alone  
561 GUIs.
- 562 • J.A.G. provided Figure 1.
- 563 • A.V, P.P.N, S.S, G.J., and P.M, contributed to and reviewed the manuscript.
